# Interactions between Urinary 4-tert-Octylphenol Levels and Metabolism Enzyme Gene Variants on Idiopathic Male Infertility

Yufeng Qin<sup>1,2,3</sup>, Minjian Chen<sup>1,2,3</sup>, Wei Wu<sup>1,2,3</sup>, Bin Xu<sup>1,2</sup>, Rong Tang<sup>1,2</sup>, Xiaojiao Chen<sup>1,2</sup>, Guizhen Du<sup>1,2</sup>, Chuncheng Lu<sup>1,2</sup>, John D. Meeker<sup>3</sup>, Zuomin Zhou<sup>1</sup>, Yankai Xia<sup>1,2\*</sup>, Xinru Wang<sup>1,2\*</sup>

**1** State Key Laboratory of Reproductive Medicine, Institute of Toxicology, Nanjing Medical University, Nanjing, China, **2** Key Laboratory of Modern Toxicology of Ministry of Education, School of Public Health, Nanjing Medical University, Nanjing, China, **3** Department of Environmental Health Sciences, University of Michigan School of Public Health, Ann Arbor, Michigan, United States of America

## Abstract

Octylphenol (OP) and Trichlorophenol (TCP) act as endocrine disruptors and have effects on male reproductive function. We studied the interactions between 4-tert-Octylphenol (4-t-OP), 4-n-Octylphenol (4-n-OP), 2,3,4-Trichlorophenol (2,3,4-TCP), 2,4,5-Trichlorophenol (2,4,5-TCP) urinary exposure levels and polymorphisms in selected xenobiotic metabolism enzyme genes among 589 idiopathic male infertile patients and 396 controls in a Han-Chinese population. Ultra high performance liquid chromatography-tandem mass spectrometry (UPLC-MS/MS) was used to measure alkylphenols and chlorophenols in urine. Polymorphisms were genotyped using the SNPstream platform and the Taqman method. Among four phenols that were detected, we found that only exposure to 4-t-OP increased the risk of male infertility ( $P_{\text{trend}} = 1.70 \times 10^{-7}$ ). The strongest interaction was between 4-t-OP and rs4918758 in *CYP2C9* ( $P_{\text{inter}} = 6.05 \times 10^{-7}$ ). It presented a significant monotonic increase in risk estimates for male infertility with increasing 4-t-OP exposure levels among men with TC/CC genotype (low level compared with non-exposed, odds ratio (OR) = 2.26, 95% confidence intervals (CI) = 1.06, 4.83; high level compared with non-exposed, OR = 9.22, 95% CI = 2.78, 30.59), but no associations observed among men with TT genotype. We also found interactions between 4-t-OP and rs4986894 in *CYP2C19*, and between rs1048943 in *CYP1A1*, on male infertile risk ( $P_{\text{inter}} = 8.09 \times 10^{-7}$ ,  $P_{\text{inter}} = 3.73 \times 10^{-4}$ , respectively). We observed notable interactions between 4-t-OP exposure and metabolism enzyme gene polymorphisms on idiopathic infertility in Han-Chinese men.

**Citation:** Qin Y, Chen M, Wu W, Xu B, Tang R, et al. (2013) Interactions between Urinary 4-tert-Octylphenol Levels and Metabolism Enzyme Gene Variants on Idiopathic Male Infertility. PLoS ONE 8(3): e59398. doi:10.1371/journal.pone.0059398

**Editor:** W. Steven Ward, University of Hawaii at Manoa, John A. Burns School of Medicine, United States of America

**Received:** December 18, 2012; **Accepted:** February 13, 2013; **Published:** March 15, 2013

**Copyright:** © 2013 Qin et al. This is an open-access article distributed under the terms of the Creative Commons Attribution License, which permits unrestricted use, distribution, and reproduction in any medium, provided the original author and source are credited.

**Funding:** This study was supported in part by National Basic Research Program of China (973 Program, 2012CBA01306, 2009CB941703); National Natural Science Foundation of China (81072328); The Key Project of National Natural Science Foundation (30930079); The Key Project of MOE (211063). The Program for Postgraduates Research Innovation in University of Jiangsu Province (CXZZ12-0600). Priority Academic Program Development of Jiangsu Higher Education Institutions (PAPD). The funders had no role in study design, data collection and analysis, decision to publish, or preparation of the manuscript.

**Competing Interests:** The authors have declared that no competing interests exist.

\* E-mail: yankaixia@njmu.edu.cn (YX); xrwang@njmu.edu.cn (XW)

† These authors contributed equally to this work.

## Introduction

Octylphenol (OP) and Trichlorophenol (TCP) are the representative members of alkylphenols and chlorophenols, chemicals that are extensively used in a wide range of industrial, commercial and agricultural applications [1–3]. In recent years, health concerns related to their widespread use have surfaced based on evidence for bioaccumulation in organisms and reproductive toxicity [4,5]. Two isoforms of OP, 4-tert-Octylphenol (4-t-OP) and 4-n-Octylphenol (4-n-OP) are still used in Asian countries and are commonly detected in environmental media, such as wastewaters, fish tissue and are ubiquitous in the food supply [2,6]. Exposure to OP is a matter of concern because it has been shown to be estrogenic and has the potential to interfere with normal endocrine function through human estrogen receptors [7]. Toxicological studies have consistently reported associations between exposure to OPs and impaired health, including adverse effects on male reproduction [8–10]. 2,3,4-Trichlorophenol (2,3,4-TCP) and 2,4,5-Trichlorophenol (2,4,5-TCP) are important

representatives of chlorinated organic compounds. Besides representing human health risks through oral exposure, TCP tends to bioaccumulate following release into the environment during the manufacture of chlorinated compounds and during the chlorination of drinking water [11–13]. Therefore, exposure to TCPs can occur through ingestion of food and water. A recent study indicated that TCPs may reduce testosterone levels by disrupting cAMP signaling [14].

Human exposure to estrogenic chemicals is hypothesized to be associated with a range of reproductive disorders, such as testicular germ line cancer and prostate intraepithelial hyperplasias [15–17]. However, these xenobiotics can be detoxified and the enzymes involved in this process include phase I enzymes, e.g., cytochrome P450 (CYP) family, and phase II enzymes, e.g., N-acetyltransferases (NATs) and sulfotransferases (SULTs) [18,19]. Therefore, the activity of these enzymes may modify the process of activation and/or detoxification of chemicals. In addition, it has been reported that exposure to phenols may inhibit metabolism enzyme

**Table 1.** Characteristics of the cases and controls.

| Variable                  | Controls (n = 396) | Cases (n = 589)               |
|---------------------------|--------------------|-------------------------------|
| Age(years, mean $\pm$ SD) | 29.75 $\pm$ 3.43   | 28.41 $\pm$ 4.61 <sup>a</sup> |
| Smoking status            |                    |                               |
| Ever                      | 189 (52.1)         | 306 (52.4)                    |
| Never                     | 174 (47.9)         | 278 (47.6)                    |
| Drinking                  |                    |                               |
| Yes                       | 184 (51.0)         | 299 (51.1)                    |
| No                        | 177 (49.0)         | 286 (48.9)                    |
| BMI                       | 23.73 $\pm$ 3.33   | 23.26 $\pm$ 3.19 <sup>a</sup> |

<sup>a</sup> $P < 0.05$  for T test or two-side  $\chi^2$  test for selected characteristics distributions between control and case groups.

doi:10.1371/journal.pone.0059398.t001

activity [20]. Genetic variants can also modify the catalytic activity of enzymes [21,22]. Thus, susceptibility to the effects of phenols exposure may vary between individuals, possibly due to polymorphisms in metabolizing enzymes. To our knowledge, no studies have investigated the potential interaction between OPs and TCPs exposure and metabolism enzyme genes variants in relation to male infertility in Han-Chinese population.

In this study, we assessed relationships between urinary concentrations of several OPs and TCPs and male infertility for the first time. We also studied the potential interaction of OPs, TCPs and variants in metabolism enzyme genes on male infertility.

## Materials and Methods

### Study Population and Sample Collection

The protocol and consent form were approved by the Institutional Review Board of Nanjing Medical University prior to the study. Fertile controls and male infertility patients were consecutively recruited from the Affiliated Hospitals of Nanjing Medical University from 2005 to 2008. The patients had been unable to conceive for at least 12 months (without diagnosed infertile wives) and had undergone a complete historical and physical examination. The control subjects were fertile men from the early pregnancy registry of the same hospitals who were in the third month following a successful pregnancy. They were healthy men with normal reproductive function and confirmed having healthy babies 6–8 months later [23]. All activities involving human subjects were done under full compliance with government policies and the Helsinki Declaration. Consecutive eligible men were recruited to participate, 1317 in total were asked. Of those approached, 89.2% consented (1175 participants; 707 cases and 468 controls). After the study procedures were explained and all questions were answered, subjects signed informed consent forms. A completed physical examination including height and weight was performed, and a questionnaire was used to collect information including personal background, lifestyle factors, occupational and environmental exposures, genetic risk factors, sexual and reproduction status, medical history and physical activity. Men with abnormal sexual and ejaculatory functions, immune infertility, semen non-liquefaction, medical history of risk factors for infertility (e.g., varicocele, postvasectomy or orchidopexy), and receiving treatment for infertility (e.g., hormonal treatments) were excluded from the study (54 of 707 subjects). Men with other known causes related to male infertility, such as genetic disease, infection, or occupational exposure to agents suspected to be

associated with male reproduction, were also excluded (34 of 653 subjects). Furthermore, to avoid azoospermia or severe oligozoospermia caused by Y chromosome microdeletions, we excluded subjects with Y chromosome microdeletions of Azoospermia Factor (AZF) region (11 of 619 subjects, microdeletion rate was 1.78%). Those subjects who declined to leave both blood samples and urine samples were excluded in our study. We also excluded the samples that did not pass quality control checks. In total 396 fertile controls and 589 infertile patients were included in this study and claimed that their life styles and environments had not changed for several months leading up to sample collection. After completing a questionnaire including detailed information, such as age, cigarette smoking, and alcohol consumption, each subject donated 5 ml of blood which was used for genomic DNA extraction and a urine sample for measuring the concentrations of 4-t-OP, 4-n-OP, 2,3,4-TCP and 2,4,5-TCP.

### Exposure Assessment

We measured total urinary concentrations of 4-t-OP, 4-n-OP, 2,3,4-TCP and 2,4,5-TCP using ultra high performance liquid chromatography-tandem mass spectrometry (UPLC-MS/MS). Briefly, urine samples were incubated in 1 M ammonium acetate buffer solution (pH = 5.0) for hydrolyzation with  $\beta$ -glucuronidase/sulfatase (20000 units/mL) overnight. After hydrolysis, the phenols were extracted and pre-concentrated with solid phase extraction (500 mg/3 mL, Supelclean, USA), and determined with UPLC (Acquity UPLCTM 6 BEH C18 column, 1.7  $\mu$ m, 2.1 $\times$ 100 mm) electrospray ionization (negative ion mode)-MS/MS. The limits of detection (LOD) were 0.28  $\mu$ g/L (2,3,4-TCP), 0.15  $\mu$ g/L (2,4,5-TCP), 0.34  $\mu$ g/L (4-t-OP) and 0.02  $\mu$ g/L (4-n-OP). Creatinine concentrations were analyzed using an automated chemistry analyzer (7020 Hitachi, Tokyo, Japan).

### SNP Selection and Genotype Analyses

Through information gained from PubMed and Hapmap, we identified twenty potential functional polymorphisms in metabolism enzymes: *CYP1A1* rs1048943, *CYP2B6* rs3760657, rs2054675, rs707265 and rs1042389, *CYP2C8* rs1058932, *CYP2C9* rs4918758, *CYP2C19* rs3814637, rs4986894 and rs11568732, *CYP2S1* rs3810171 and rs338583, *NAT1* rs7845127 and rs10888150, *NAT2* rs1799930, rs1799931, rs4646246 and rs4646243, *SULT1E1* rs4149525 and rs3736599 (Table 1). All selected single nucleotide polymorphism (SNPs) have reported minor allele frequencies (MAF) of  $>0.05$  in Han-Chinese population and are located in potential functional areas. In the case of multiple SNPs in the same haplotype block (linkage coefficient  $r^2 > 0.8$ ), only one was selected. Eight SNPs (rs2054675, rs707265, rs1042389, rs4986894, rs11568732, rs338583, rs10888150, rs1799931) were genotyped by using TaqMan SNP Genotyping Assays (Biosteel, Nanjing, China) and the other twelve SNPs (rs1048943, rs3760657, rs1058932, rs4918758, rs3814637, rs3810171, rs7845127, rs1799930, rs4646246, rs4646243, rs4149525 and rs3736599) were genotyped by GenomeLab SNPstream high throughput 12-plex genotyping Platform (Beckman Coulter, Fullerton, CA) following the manufacturer's instructions [24]. For quality control, 10% of the samples were randomly genotyped again, and the repeatability was 100%.

### Statistical Analyses

Statistical analyses were carried out using Stata 10.0 statistical software package (Stata Corp, LP). Pearson's chi-squared test was used to test the differences of categorical variables such as drinking and smoking status between cases and controls. Student's t-test was used to test for differences in continuous variables such as age and

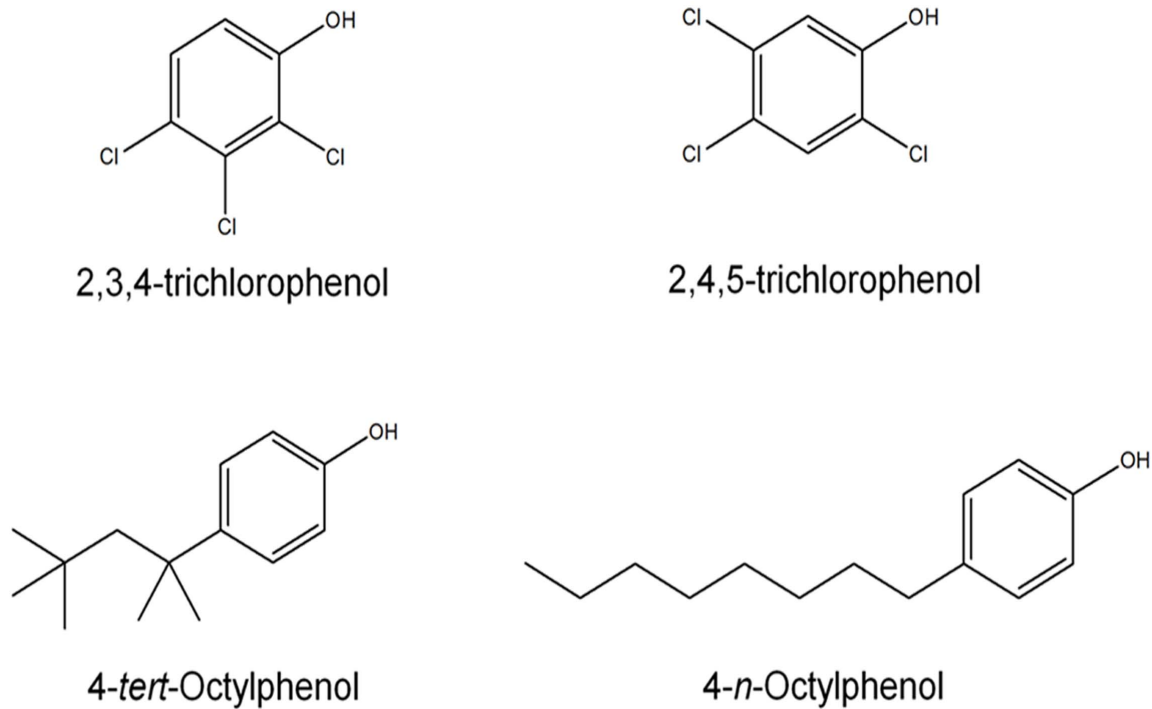

**Figure 1. Molecular structures of 4-tert-Octylphenol (4-t-OP), 4-n-Octylphenol (4-n-OP), 2,3,4-Trichlorophenol (2,3,4-TCP) and 2,4,5-Trichlorophenol (2,4,5-TCP).**  
 doi:10.1371/journal.pone.0059398.g001

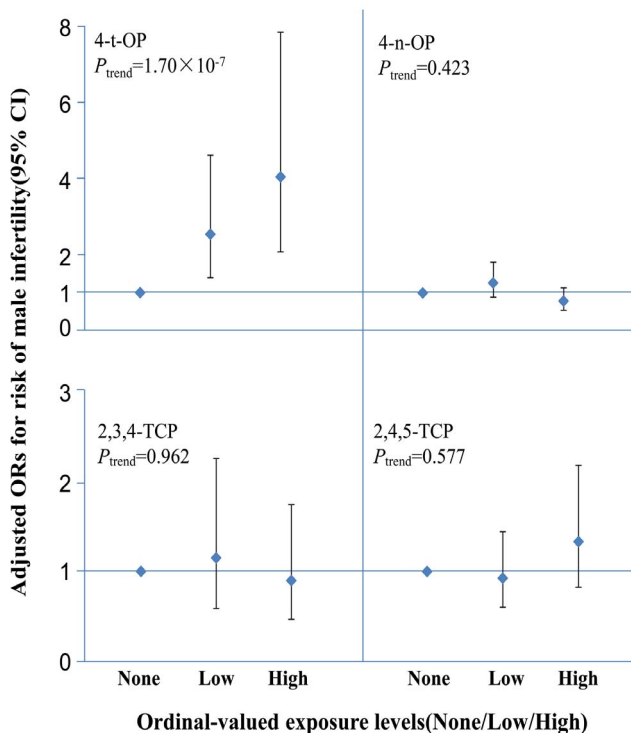

**Figure 2. Adjusted ORs for risk of male infertility (95% CI).** Logistic regression was used with categories of ordinal-valued exposure variables of 4-t-OP, 4-n-OP, 2,3,4-TCP and 2,4,5-TCP, adjusted for age, BMI and creatinine (n = 985).  
 doi:10.1371/journal.pone.0059398.g002

body mass index (BMI) between groups. For SNP main effects analysis, we used additive genetic models. For exposure main effects analysis and interaction analysis, we categorized exposure variables ordinally (none/low/high). Men with urinary exposure level below the LOD were the reference group (non-exposed) and those with urinary exposure levels above the LOD were categorized into two groups using the urinary concentration median among samples with detectable levels as the cut-point separating “low” and “high”.

Associations between exposure and the risk of male infertility were evaluated by computing odds ratios (ORs) and their 95% confidence intervals (CIs) from logistic regression analyses with adjustment for age, BMI and urinary creatinine. The joint effects of exposure were evaluated by using multivariate logistic regression to calculate the odds of infertility associated with detection of multiple chemicals in urine, adjusted for age and BMI, with the

**Table 2. Distribution of 4-t-OP, 4-n-OP, 2,3,4-TCP, and 2,4,5-TCP concentrations in urine ( $\mu\text{g/L}$ ) in Han-Chinese males (n = 985).**

| Analytes  | Geometric mean(95%CI) | percentile |       |       |      |      |
|-----------|-----------------------|------------|-------|-------|------|------|
|           |                       | 50th       | 75th  | 90th  | 95th | 99th |
| 4-t-OP    | 0.60 (0.56–0.64)      | < LOD      | < LOD | 0.46  | 0.65 | 1.32 |
| 4-n-OP    | 0.05 (0.05–0.06)      | < LOD      | 0.03  | 0.08  | 0.11 | 0.45 |
| 2,3,4-TCP | 0.53 (0.48–0.59)      | < LOD      | < LOD | < LOD | 0.43 | 1.02 |
| 2,4,5-TCP | 0.32 (0.29–0.35)      | < LOD      | < LOD | 0.24  | 0.37 | 0.85 |

LOD for 4-t-OP, 4-n-OP, 2, 3, 4-TCP and 2, 4, 5-TCP were 0.34  $\mu\text{g/L}$ , 0.02  $\mu\text{g/L}$ , 0.28  $\mu\text{g/L}$ , and 0.15  $\mu\text{g/L}$ , respectively.  
 doi:10.1371/journal.pone.0059398.t002

**Table 3.** Joint effects of urinary 4-t-OP, 4-n-OP, 2,3,4-TCP and 2,4,5-TCP Levels and male infertility (n = 985).

| No. of exposed chemicals  | Ca/Co   | OR(95%CI) <sup>a</sup> | <i>P</i> <sup>b</sup> |
|---------------------------|---------|------------------------|-----------------------|
| Reference group           | 229/179 | 1.00(reference)        |                       |
| 1                         | 243/163 | 1.26(0.94–1.69)        | 0.121                 |
| ≥2                        | 117/54  | 1.77(1.19–2.62)        | 0.010                 |
| <i>P</i> <sub>trend</sub> |         |                        | 0.008                 |

Ca: Cases; Co: Controls.

<sup>a</sup>Adjusted for age, BMI and creatinine.<sup>b</sup>False Discovery Rate-corrected *P* value.

doi:10.1371/journal.pone.0059398.t003

non-exposed group as a reference. We used QVALUE software to calculate false discovery rate (FDR)-adjusted *P* value [25].

Potential gene-environment interactions were tested by comparing the changes in deviance ( $-2 \log$  likelihood) between models of main effects with or without the interaction term. Stepwise regression was used to avoid interference and identify the most important interactions. We used the homozygous wild-type, non-exposed men as the reference category. The ORs and 95% CIs for the remaining genotype-exposure categories were estimated. An alpha of 0.05 was considered the threshold of significance.

## Results

### Characteristics of the Study Population

The study contained 589 infertile male patients and 396 control men proven fertility. No significant differences were identified between case and control groups with regard to smoking and drinking status. However, there were significant differences in age and BMI between cases and controls (Table 1). The mean ( $\pm$  SD) age and BMI were  $29.75 \pm 3.43$  years and  $23.73 \pm 3.33$  in control group, respectively. The mean ( $\pm$  SD) age and BMI in case group are  $28.41 \pm 4.61$  years and  $23.26 \pm 3.19$ .

### Associations between Urinary Exposure Levels and Male Infertility

The structure of 4-t-OP, 4-n-OP, 2,3,4-TCP, 2,4,5-TCP are presented in Figure 1, and distributions of their urinary concentrations in the 985 participants are presented in Table 2. Geometric means of 4-t-OP, 4-n-OP, 2,3,4-TCP and 2,4,5-TCP were 0.60  $\mu$ g/L, 0.05  $\mu$ g/L, 0.53  $\mu$ g/L and 0.32  $\mu$ g/L, respectively. There were no associations between 4-n-OP, 2,3,4-TCP, or 2,4,5-TCP and male infertility. High exposure to 4-t-OP was significantly associated with male infertility ( $P_{\text{trend}} = 1.70 \times 10^{-7}$ , OR = 4.05, 95% CI = 2.08–7.87) (Figure 2, Table S1). Considering the possibility of combined risk from being exposed to multiple chemicals, we analyzed the joint effect of these four phenols on male infertility. We found that men exposed to more than one chemical had significantly elevated odds of infertility ( $P_{\text{trend}} = 0.008$ ) (Table 3).

### Associations between Polymorphisms and Male Infertility

A total of 20 SNPs in metabolism enzyme genes were investigated in our study. Results for SNP main effects in relation to male infertility are presented in Table 4. However, no significant associations with male infertility were retained after FDR adjustment.

**Table 4.** Associations between metabolism enzyme gene SNPs and male infertility.

| Gene    | SNP        | Position | Nucleotide change | MAF <sup>a</sup> | OR(95%CI) <sup>b,c</sup> | <i>P</i> <sup>d</sup> |
|---------|------------|----------|-------------------|------------------|--------------------------|-----------------------|
| CYP1A1  | rs1048943  | nsSNP    | A>G               | 0.256            | 1.08<br>(0.52–2.25)      | 0.938                 |
| CYP2B6  | rs3760657  | 5F       | A>G               | 0.146            | 0.76<br>(0.38–1.52)      | 0.938                 |
| CYP2B6  | rs2054675  | 5F       | T>C               | 0.185            | 1.73<br>(0.76–3.98)      | 0.776                 |
| CYP2B6  | rs707265   | 5F       | G>A               | 0.341            | 0.96<br>(0.63–1.45)      | 0.938                 |
| CYP2B6  | rs1042389  | 3'UTR    | T>C               | 0.314            | 0.93<br>(0.58–1.51)      | 0.938                 |
| CYP2C8  | rs1058932  | 3'UTR    | C>T               | 0.372            | 1.11<br>(0.72–1.71)      | 0.938                 |
| CYP2C9  | rs4918758  | 5F       | T>C               | 0.337            | 0.87<br>(0.57–1.31)      | 0.938                 |
| CYP2C19 | rs3814637  | 5F       | C>T               | 0.116            | 1.06<br>(0.29–3.92)      | 0.977                 |
| CYP2C19 | rs4986894  | 5F       | T>C               | 0.244            | 0.91<br>(0.56–1.47)      | 0.938                 |
| CYP2C19 | rs11568732 | 5F       | T>G               | 0.093            | 2.46<br>(0.66–9.19)      | 0.776                 |
| CYP2S1  | rs3810171  | 5F       | C>T               | 0.100            | 7.51<br>(0.96–58.89)     | 0.730                 |
| CYP2S1  | rs338583   | 3'UTR    | T>C               | 0.195            | 1.00<br>(0.46–2.19)      | 0.992                 |
| NAT1    | rs7845127  | 5F       | C>T               | 0.407            | 1.18<br>(0.77–1.82)      | 0.938                 |
| NAT1    | rs10888150 | 5F       | T>C               | 0.442            | 0.95<br>(0.65–1.39)      | 0.938                 |
| NAT2    | rs1799930  | nsSNP    | G>A               | 0.167            | 1.17<br>(0.56–2.42)      | 0.938                 |
| NAT2    | rs1799931  | nsSNP    | G>A               | 0.222            | 0.65<br>(0.28–1.51)      | 0.938                 |
| NAT2    | rs4646246  | 5F       | G>A               | 0.488            | 1.44<br>(0.97–2.15)      | 0.730                 |
| NAT2    | rs4646243  | 5F       | C>T               | 0.411            | 0.76<br>(0.51–1.12)      | 0.776                 |
| SULT1E1 | rs4149525  | 5F       | A>G               | 0.267            | 0.95<br>(0.58–1.55)      | 0.938                 |
| SULT1E1 | rs3736599  | 5F       | G>A               | 0.226            | 1.04<br>(0.79–1.36)      | 0.938                 |

<sup>a</sup>Minimum allele frequency in the general Han Chinese population.<sup>b</sup>Additive genetic model was used.<sup>c</sup>Adjusted for age and BMI.<sup>d</sup>False Discovery Rate-corrected *P* value.

doi:10.1371/journal.pone.0059398.t004

### Interaction between Exposure Level and Polymorphisms on Male Infertility

We tested for interactions between 4-t-OP and metabolism enzyme gene polymorphisms. About twenty interactions that were tested met the FDR-adjusted *P* value <0.05 criterion in total (Table S2). We then used stepwise regression to avoid interferences and to identify the most important interactions. In the end, interactions between 4-t-OP and rs4918758, rs4986894 and rs1048943 were retained (Table 5). The strongest interaction was between 4-t-OP and rs4918758 in CYP2C9 ( $P_{\text{inter}} = 6.05 \times 10^{-7}$ ). Odds for infertility were significantly increased with increasing 4-t-OP exposure among men with TC/CC



**Table 5.** Interactions between urinary 4-t-OP, 4-n-OP, 2,3,4-TCP and 2,4,5-TCP levels and polymorphisms on male infertility.

| Analytes | SNPs      | Genotype | 4-t-OP exposure level |       |                  |      |                    | $P_{inter}^{b, c}$    |
|----------|-----------|----------|-----------------------|-------|------------------|------|--------------------|-----------------------|
|          |           |          | None                  | Low   | High             | None | Low                |                       |
| CYP2C9   | rs4918758 | TT       | 163/115               | 19/7  | 2.56(0.91–7.16)  | 18/9 | 1.62(0.67–3.96)    | $6.05 \times 10^{-7}$ |
|          |           | TC+CC    | 307/242               | 37/10 | 2.26(1.06–4.83)  | 43/4 | 9.22(2.78–30.59)   |                       |
| CYP2C19  | rs4986894 | TT       | 230/153               | 26/9  | 2.06(0.86–4.96)  | 28/9 | 1.99(0.90–4.42)    | $8.09 \times 10^{-7}$ |
|          |           | TC+CC    | 222/191               | 25/7  | 2.11(0.87–5.13)  | 30/2 | 17.35(2.33–129.04) |                       |
| CYP1A1   | rs1048943 | AA       | 291/228               | 35/13 | 2.00(1.00–4.00)  | 39/9 | 3.44(1.56–7.57)    | $3.73 \times 10^{-4}$ |
|          |           | AG+GG    | 179/132               | 19/4  | 4.32(1.23–15.18) | 21/4 | 5.47(1.59–18.92)   |                       |

None: non-exposed; Low: low level exposure; High: high level exposure; Ca: Cases; Co: Controls.

<sup>a</sup>Adjusted for age, BMI and creatinine.

<sup>b</sup>False Discovery Rate-corrected  $P$  value.

<sup>c</sup> $P_{inter}$  for the stepwise regression  $<0.05$ .

doi:10.1371/journal.pone.0059398.t005

genotype (for low exposure level compared with non-exposed, OR = 2.26, 95%CI = 1.06, 4.83; for high exposure level compared with non-exposed, OR = 9.22, 95%CI = 2.78, 30.59; but no association among with TT genotype for low exposure level compared with non-exposed [OR = 2.56, 95%CI = 0.91, 7.16, for high exposure level compared with non-exposed; OR = 1.62, 95%CI = 0.67, 3.96]). We observed a significant interaction between rs4986894 in *CYP2C19* and 4-t-OP on male infertility only among the TC/CC genotype and high 4-t-OP exposure group ( $P_{inter} = 8.09 \times 10^{-7}$ , OR = 17.35, 95%CI = 2.33–129.04). The interaction between 4-t-OP exposure and rs1048943 in *CYP1A1* was also significant after adjustment (low level compared with non-exposed, OR = 2.00, 95%CI = 1.00, 4.00; for high level compared with non-exposed, OR = 3.44, 95%CI = 1.56, 7.57 in AA genotype group; for low level compared with non-exposed OR = 4.32, 95%CI = 1.23, 15.18; for high level compared with non-exposed, OR = 5.47, 95%CI = 1.59, 18.92 in AG/GG genotype).

## Discussion

Our study is the first study to evaluate the interaction between phenols exposure and metabolism enzyme polymorphisms in male infertility risk. In multivariable analyses for main effects, high exposure to 4-t-OP was associated with significant elevations in the odds of male infertility, while there were no significant associations between metabolism enzyme polymorphisms and male infertility. Three interactions were observed between 4-t-OP and metabolism gene polymorphisms following adjustment.

OPs are widely used in industrial manufacturing and can be detected in the environment. Exposure of male rats to 4-t-OP caused increased sperm abnormalities and decreased sperm number [8]. 4-n-OP has also demonstrated estrogenic and antiandrogenic effects in vitro [7]. Due to the different structure of the branched alkyl chains, there are conflicting opinions about the toxicity of the 4-t-OP and 4-n-OP [26,27]. Some groups have reported that 4-t-OP is the most estrogenic of the 4-alkylphenols, and in vitro studies have demonstrated that it binds to the estrogen receptor and activates estrogen-responsive genes [28,29]. Sachiko Nomura used the rat liver to elucidate the metabolism of 4-t-OP and 4-n-OP depended on the shape of the alkyl chains. 4-t-OP is circulated between the liver and intestine, suggesting that a continuous exposure of the target organs to the chemical occurs [30]. This may be consistent with our results, where exposure to 4-

t-OP, but not 4-n-OP, was found to be associated with increased odds of male infertility.

It is known that common diseases have complex etiologies related not only to genetic factors but also environmental factors. Recently, there has been increased interest in gene-environment interactions, which may affect infertility pathophysiology [31,32]. Thus, we also studied the interactions between phenols exposure and the genetic variants in metabolism enzymes on male infertility. The most significant interaction was between 4-t-OP and rs4918758 in *CYP2C9* ( $P_{inter} = 6.05 \times 10^{-7}$ ). It had a significant monotonic increase in male infertile risk with increasing 4-t-OP exposure in TC/CC genotype group, and no significant association in the TT genotype group. *CYP2C9*, which is a key member of CYP2C enzyme family, is responsible for the metabolism of drugs; genetic variants were reported to modify the enzyme activity, and subsequently cause toxicity [33–35]. Men carrying the rs4918758 minor allele may also have genetic susceptibility to male infertility risk when coupled with 4-t-OP exposure. We also found rs4986894 in *CYP2C19* combined with 4-t-OP exposure increased the odds of male infertility ( $P_{inter} = 8.09 \times 10^{-7}$ ). This association was significant only among the men with the mutant genotype that were also highly exposed. *CYP2C19* is also a member of CYP2C enzyme family and can metabolize drugs. Rs4986894 is located in the promoter of *CYP2C19*, and may modulate the transcriptional activity of *CYP2C19*. For rs1048943 in *CYP1A1*, exposure to 4-t-OP in both genotype groups was associated with significantly increased odds of male infertility compared with the non-exposure group. *CYP1A1*, coding the enzyme aryl hydrocarbon hydroxylase, is believed to participate in the metabolism process of certain chemicals, which can induce bulky DNA adducts in human sperm, diminished semen quality, and may result in male infertility [36,37]. Genetic variants in *CYP1A1* can influence the activity of this enzyme [38]. The rs1048943 polymorphism, an A to G substitution causing an Ile to Val amino acid exchange at codon 462, showed a significant higher catalytic activity for estrogens than the wild-type enzyme [38]. Niwa and colleagues reported that phenols exposure could inhibit the activity of CYPs, such as *CYP2C9*, *CYP2C19* and *CYP1A1* [20]. In vitro and in vivo studies also confirmed that OPs can alter the expression of steroidogenic enzymes through multiple mechanisms [39,40]. Thus, we hypothesize that 4-t-OP exposure combined with polymorphisms in *CYP2C9*, *CYP2C19* and/or

*CYP1A1* may interact to impart increased risk of male infertility. Our results could in part support this hypothesis.

Our study had a number of strengths. First of all, this is the first study to explore the potential interactions between phenols exposure and polymorphisms in metabolism enzymes on male infertility. Second, we used an improved UPLC-MS/MS method to detect the urinary OP levels, which was sensitive, accurate and easy to implement to ascertain our exposure data. In addition, we used FDR method and stepwise regression to adjust for multiple testing and reduce false-positive results. As with other case-control association studies, there were also several limitations to the present work. First, the interactions found in our study need to be confirmed using a larger study population and biologically through experimental research. Second, not all metabolism enzymes were included in this study and we may have missed some true interactions. Despite the limitations, our study, which had a large sample size, is the first to evaluate the interactions between OP exposure and gene polymorphisms on risk of male infertility.

## Conclusion

We found exposure to 4-t-OP could increase the male infertile risk and we also observed notable interactions between 4-t-OP

exposure and metabolism enzyme gene polymorphisms in relation to risk of male infertility. Our study focuses on Han-Chinese men and will improve our understanding of male reproductive effects of 4-t-OP exposure. Future studies in larger populations are needed to replicate our findings, as are studies designed to explore the potential mechanisms involved.

## Supporting Information

**Table S1** Associations between urinary 4-t-OP, 4-n-OP, 2,3,4-TCP, and 2,4,5-TCP levels and Male Infertility. (DOCX)

**Table S2** Interactions between urinary 4-t-OP, 4-n-OP, 2, 3, 4-TCP, 2, 4, 5-TCP levels and polymorphisms on Male Infertility. (DOCX)

## Author Contributions

Conceived and designed the experiments: YX XW. Performed the experiments: YQ MC. Analyzed the data: YQ WW BX. Contributed reagents/materials/analysis tools: RT XC GD CL ZZ. Wrote the paper: YQ JDM YX XW.

## References

- Calafat AM, Ye X, Wong LY, Reidy JA, Needham LL (2008) Exposure of the U.S. population to bisphenol A and 4-tertiary-octylphenol: 2003–2004. *Environ Health Perspect* 116: 39–44.
- David A, Fenet H, Gomez E (2009) Alkylphenols in marine environments: distribution monitoring strategies and detection considerations. *Mar Pollut Bull* 58: 953–960.
- Ying GG (2006) Fate, behavior and effects of surfactants and their degradation products in the environment. *Environ Int* 32: 417–431.
- Colborn T, vom Saal FS, Soto AM (1993) Developmental effects of endocrine-disrupting chemicals in wildlife and humans. *Environ Health Perspect* 101: 378–384.
- Sumpter JP (1998) Xenoendocrine disruptors—environmental impacts. *Toxicol Lett* 102–103: 337–342.
- Hawker DW, Cumming JL, Neale PA, Bartkow ME, Escher BI (2011) A screening level fate model of organic contaminants from advanced water treatment in a potable water supply reservoir. *Water Res* 45: 768–780.
- Bonfeld-Jørgensen EC, Long M, Hofmeister MV, Vinggaard AM (2007) Endocrine-disrupting potential of bisphenol A, bisphenol A dimethacrylate, 4-n-nonylphenol, and 4-n-octylphenol in vitro: new data and a brief review. *Environ Health Perspect* 115: 69–76.
- Blake CA, Boockfor FR, Nair-Menon JU, Millette CF, Raychoudhury SS, et al. (2004) Effects of 4-tert-octylphenol given in drinking water for 4 months on the male reproductive system of Fischer 344 rats. *Reprod Toxicol* 18: 43–51.
- Boockfor FR, Blake CA (1997) Chronic administration of 4-tert-octylphenol to adult male rats causes shrinkage of the testes and male accessory sex organs, disrupts spermatogenesis, and increases the incidence of sperm deformities. *Biol Reprod* 57: 267–277.
- Gregory M, Lacroix A, Haddad S, Devine P, Charbonneau M, et al. (2009) Effects of chronic exposure to octylphenol on the male rat reproductive system. *J Toxicol Environ Health A* 72: 1553–1560.
- Feng QZ, Zhao LX, Yan W, Lin JM, Zheng ZX (2009) Molecularly imprinted solid-phase extraction combined with high performance liquid chromatography for analysis of phenolic compounds from environmental water samples. *J Hazard Mater* 167: 282–288.
- Lampi P, Vohlonen I, Tuomisto J, Heinonen OP (2000) Increase of specific symptoms after long-term use of chlorophenol polluted drinking water in a community. *Eur J Epidemiol* 16: 245–251.
- Mirabelli MC, Hoppin JA, Tolbert PE, Herrick RF, Gnepp DR, et al. (2000) Occupational exposure to chlorophenol and the risk of nasal and nasopharyngeal cancers among U.S. men aged 30 to 60. *Am J Ind Med* 37: 532–541.
- Ma Y, Liu C, Lam PK, Wu RS, Giesy JP, et al. (2011) Modulation of steroidogenic gene expression and hormone synthesis in H295R cells exposed to PCP and TCP. *Toxicology* 282: 146–153.
- Fuortes L, Clark MK, Kirchner HL, Smith EM (1997) Association between female infertility and agricultural work history. *Am J Ind Med* 31: 445–451.
- Ho SM, Tang WY, Belmonte de Frausto J, Prins GS (2006) Developmental exposure to estradiol and bisphenol A increases susceptibility to prostate carcinogenesis and epigenetically regulates phosphodiesterase type 4 variant 4. *Cancer Res* 66: 5624–5632.
- Skakkebaek NE, Rajpert-De Meyts E, Main KM (2001) Testicular dysgenesis syndrome: an increasingly common developmental disorder with environmental aspects. *Hum Reprod* 16: 972–978.
- Guengerich FP (2001) Forging the links between metabolism and carcinogenesis. *Mutat Res* 488: 195–209.
- Turesky RJ (2004) The role of genetic polymorphisms in metabolism of carcinogenic heterocyclic aromatic amines. *Curr Drug Metab* 5: 169–180.
- Niwa T, Maekawa Y, Fujimoto M, Kishimoto K, Yabusaki Y, et al. (2002) Inhibition of human hepatic cytochrome P450 s and steroidogenic CYP17 by nonylphenol. *Biol Pharm Bull* 25: 235–238.
- Hart SN, Wang S, Nakamoto K, Wesselman C, Li Y, et al. (2008) Genetic polymorphisms in cytochrome P450 oxidoreductase influence microsomal P450-catalyzed drug metabolism. *Pharmacogenet Genomics* 18: 11–24.
- Hirvonen A (1999) Polymorphisms of xenobiotic-metabolizing enzymes and susceptibility to cancer. *Environ Health Perspect* 107: 37–47.
- Xia Y, Han Y, Wu B, Wang S, Gu A, et al. (2008) The relation between urinary metabolite of pyrethroid insecticides and semen quality in humans. *Fertil Steril* 89: 1743–1750.
- Denomme GA, Van Oene M (2005) High-throughput multiplex single-nucleotide polymorphism analysis for red cell and platelet antigen genotypes. *Transfusion* 45: 660–666.
- Storey JD, Tibshirani R (2003) Statistical significance for genome-wide experiments. *Proceeding of the National Academy of Sciences* 100: 9440–9445.
- Pedersen SN, Christiansen LB, Pedersen KL, Korsgaard B, Bjerregaard P (1999) In vivo estrogenic activity of branched and linear alkylphenols in rainbow trout (*Oncorhynchus mykiss*). *Science of the Total Environment* 233: 89–96.
- Isidori M, Lavorgna M, Nardelli A, Parrella A (2006) Toxicity on crustaceans and endocrine disrupting activity on *Saccharomyces cerevisiae* of eight alkylphenols. *Chemosphere* 64: 135–143.
- White E, Malone KE, Weiss NS, Daling JR (1994) Breast cancer among young U.S. women in relation to oral contraceptive use. *Journal of the National Cancer Institute* 86: 505–514.
- Routledge EJ, Sumpter JP (1997) Structural features of alkylphenolic chemicals associated with estrogenic activity. *Journal of Biological Chemistry* 272: 3280–3288.
- Nomura S, Daidoji T, Inoue H, Yokota H (2008) Differential metabolism of 4-n- and 4-tert-octylphenols in perfused rat liver. *Life Sci* 83: 223–228.
- Barry KH, Koutros S, Berndt SI, Andreotti G, Hoppin JA, et al. (2011) Genetic variation in base excision repair pathway genes, pesticide exposure, and prostate cancer risk. *Environ Health Perspect* 119: 726–732.
- Ji G, Gu A, Wang Y, Huang C, Hu F, et al. (2012) Genetic variants in antioxidant genes are associated with sperm DNA damage and risk of male infertility in a Chinese population. *Free Radic Biol Med* 52: 775–780.
- Takahashi H, Echizen H (2001) Pharmacogenetics of warfarin elimination and its clinical implications. *Clin Pharmacokinet* 40: 587–603.
- Miners J (2002) CYP2C9 polymorphism: impact on tolbutamide pharmacokinetics and response. *Pharmacogenetics* 12: 91–92.
- Lee CR, Goldstein JA, Pieper JA (2002) Cytochrome P450 2C9 polymorphisms: a comprehensive review of the in-vitro and human data. *Pharmacogenetics* 12: 251–263.

36. Shimada T, Fujii-Kuriyama Y (2004) Metabolic activation of polycyclic aromatic hydrocarbons to carcinogens by cytochromes P450 1A1 and 1B1. *Cancer Sci* 95: 1–6.
37. Ji G, Gu A, Zhou Y, Shi X, Xia Y, et al. (2010) Interactions between exposure to environmental polycyclic aromatic hydrocarbons and DNA repair gene polymorphisms on bulky DNA adducts in human sperm. *PLoS One* 5 pii: e13145.
38. Kisselev P, Schunck WH, Roots I, Schwarz D (2005) Association of CYP1A1 polymorphisms with differential metabolic activation of 17beta-estradiol and estrone. *Cancer Res* 65: 2972–2978.
39. Akgul Y, Derk RC, Meighan T, Rao KM, Murono EP (2008) The methoxychlor metabolite, HPTE, directly inhibits the catalytic activity of cholesterol side-chain cleavage (P450<sub>scc</sub>) in cultured rat ovarian cells. *Reprod Toxicol* 25: 67–75.
40. Kim SK, Kim JH, Lee HJ, Yoon YD (2007) Octylphenol reduces the expressions of steroidogenic enzymes and testosterone production in mouse testis. *Environ Toxicol* 22: 449–458.
